# Supplementary material for: Feature‐Based Classification of Amino Acid Substitutions outside Conserved Functional Protein Domains
Source: Hindawi journal article supplement (doi:10.1155/2013/948617), 2013-01-01
Supplement: f1 [file 948617.f1.pdf]

**Supplement:** Detailed dataset – all amino acid substitutions in ASXL1, EZH2, DNMT3A and TET2, with original literature

| <b>Gene</b> | <b>AAS</b> | <b>SNP/MUT</b> | <b>Disease</b> | <b>Reference</b> |
|-------------|------------|----------------|----------------|------------------|
| ASXL1       | S25L       | SNP            |                | [1]              |
| ASXL1       | M29V       | SNP            |                | [1]              |
| ASXL1       | Q89R       | SNP            |                | [2]              |
| ASXL1       | A95V       | SNP            |                | [1]              |
| ASXL1       | C111Y      | SNP            |                | [1]              |
| ASXL1       | M168L      | SNP            |                | [2]              |
| ASXL1       | I268F      | SNP            |                | [2]              |
| ASXL1       | R394H      | SNP            |                | [3]              |
| ASXL1       | R402Q      | MUT            | MDS            | [3]              |
| ASXL1       | S412F      | SNP            |                | [2]              |
| ASXL1       | E477Q      | SNP            |                | [2]              |
| ASXL1       | R489G      | SNP            |                | [2, 3]           |
| ASXL1       | I507N      | SNP            |                | [2]              |
| ASXL1       | R541W      | SNP            |                | [1]              |
| ASXL1       | I552V      | SNP            |                | [2]              |
| ASXL1       | A636V      | SNP            |                | [4]              |
| ASXL1       | A637T      | SNP            |                | [4]              |
| ASXL1       | G643V      | SNP            |                | [2]              |
| ASXL1       | G652S      | SNP            |                | [2, 4]           |
| ASXL1       | C687R      | SNP            |                | [2]              |
| ASXL1       | T688M      | SNP            |                | [4]              |
| ASXL1       | R693Q      | SNP            |                | [4]              |
| ASXL1       | G704R      | SNP            |                | [4]              |
| ASXL1       | P722R      | SNP            |                | [4]              |
| ASXL1       | D741V      | SNP            |                | [2]              |
| ASXL1       | G744R      | MUT            | MPN or MDS/MPN | [1]              |
| ASXL1       | V751I      | SNP            |                | [2]              |
| ASXL1       | P779L      | SNP            |                | [2]              |
| ASXL1       | E788G      | MUT            | MPN or MDS/MPN | [1]              |
| ASXL1       | D799Y      | SNP            |                | [2, 4]           |
| ASXL1       | T806A      | SNP            |                | [1]              |
| ASXL1       | P808H      | MUT            | MPN or MDS/MPN | [1]              |
| ASXL1       | T822I      | MUT            | MPN or MDS/MPN | [1]              |
| ASXL1       | L823S      | SNP            |                | [3]              |
| ASXL1       | K838R      | SNP            |                | [1, 2]           |
| ASXL1       | S846N      | MUT            | MDS, MDS/MPN   | [5, 6]           |
| ASXL1       | E865K      | SNP            |                | [2, 4]           |
| ASXL1       | M875V      | SNP            |                | [4]              |
| ASXL1       | D979G      | SNP            |                | [1]              |
| ASXL1       | L983R      | SNP            |                | [2]              |
| ASXL1       | T1010M     | SNP            |                | [2]              |
| ASXL1       | G1026E     | SNP            |                | [2]              |

|       |        |     |                    |              |
|-------|--------|-----|--------------------|--------------|
| ASXL1 | E1033V | SNP |                    | [7]          |
| ASXL1 | P1035S | MUT | MPN or MDS/MPN     | [1]          |
| ASXL1 | V1046M | SNP |                    | [4]          |
| ASXL1 | R1051C | SNP |                    | [4]          |
| ASXL1 | P1089S | MUT | MPN or MDS/MPN     | [1]          |
| ASXL1 | V1092M | MUT | MPN or MDS/MPN     | [1]          |
| ASXL1 | D1127N | SNP |                    | [2]          |
| ASXL1 | M1161V | SNP |                    | [1]          |
| ASXL1 | S1166R | SNP |                    | [2, 3]       |
| ASXL1 | R1171S | SNP |                    | [8]          |
| ASXL1 | G1187V | SNP |                    | [7]          |
| ASXL1 | P1197S | SNP |                    | [4]          |
| ASXL1 | R1247C | SNP |                    | [2]          |
| ASXL1 | M1249V | SNP |                    | [1, 2, 4]    |
| ASXL1 | D1252G | SNP |                    | [2]          |
| ASXL1 | P1259L | SNP |                    | [2]          |
| ASXL1 | V1297I | SNP |                    | [2]          |
| ASXL1 | A1312V | SNP |                    | [2-4]        |
| ASXL1 | R1316H | SNP |                    | [4]          |
| ASXL1 | L1325F | SNP |                    | [2, 9]       |
| ASXL1 | G1339E | MUT | MPN, Breast cancer | [10, 11]     |
| ASXL1 | A1380V | SNP |                    | [1]          |
| ASXL1 | L1395V | SNP |                    | [2, 12]      |
| ASXL1 | G1397S | SNP |                    | [2-4]        |
| ASXL1 | M1402L | SNP |                    | [1]          |
| ASXL1 | S1428P | SNP |                    | [2, 4]       |
| ASXL1 | F1463L | SNP |                    | [4]          |
| ASXL1 | A1486T | MUT | MDS                | [3]          |
| ASXL1 | T1494I | SNP |                    | [1]          |
| ASXL1 | S1496N | SNP |                    | [1]          |
| ASXL1 | S1497G | SNP |                    | [1]          |
| ASXL1 | T1498M | MUT | MPN or MDS/MPN     | [1]          |
| ASXL1 | I1514L | SNP |                    | [2]          |
| ASXL1 | C1519Y | MUT | MPN or MDS/MPN     | [1]          |
| EZH2  | I55M   | SNP |                    | [2]          |
| EZH2  | M134K  | MUT | MDS                | [3]          |
| EZH2  | L149Q  | MUT | MPN                | [11, 13]     |
| EZH2  | D185H  | SNP |                    | [2]          |
| EZH2  | E249K  | MUT | MDS                | [11, 14, 15] |
| EZH2  | Q250E  | SNP |                    | [2]          |
| EZH2  | N317S  | SNP |                    | [2]          |
| EZH2  | N361S  | SNP |                    | [3]          |
| EZH2  | A384T  | MUT | MPN, Lung cancer   | [11, 14]     |
| EZH2  | A482T  | SNP |                    | [2, 16]      |
| EZH2  | C534R  | MUT | MDS                | [3]          |
| EZH2  | T568I  | MUT | MPN                | [11, 13]     |

|        |       |     |                           |                            |
|--------|-------|-----|---------------------------|----------------------------|
| EZH2   | L575P | MUT | MDS                       | [3]                        |
| EZH2   | Y641C | MUT | AML, MDS, Lymphoid cancer | [11, 17-19]                |
| EZH2   | Q648E | MUT | MDS                       | [3]                        |
| EZH2   | A651V | MUT | MDS                       | [11, 14]                   |
| EZH2   | D652H | MUT | MDS                       | [3, 20]                    |
| EZH2   | D659A | MUT | AML                       | [11]                       |
| EZH2   | F655L | MUT | MDS                       | [3]                        |
| EZH2   | L669V | MUT | MDS                       | [11, 15]                   |
| EZH2   | D672H | MUT | MPN                       | [11, 13]                   |
| EZH2   | V674M | MUT | MPN, AML                  | [11, 13]                   |
| EZH2   | R679C | MUT | MPN, MDS/MPN              | [11, 14]                   |
| EZH2   | R685H | MUT | MDS, MPN, MDS/MPN, AML    | [3, 5, 11, 13, 14, 21, 22] |
| EZH2   | N688T | MUT | AML                       | [11, 22]                   |
| DNMT3A | E30A  | SNP |                           | [2]                        |
| DNMT3A | G278S | SNP |                           | [2]                        |
| DNMT3A | S352N | MUT | AML                       | [11, 23]                   |
| DNMT3A | K468R | MUT | AML                       | [24]                       |
| DNMT3A | V480G | SNP |                           | [2]                        |
| DNMT3A | N501S | SNP |                           | [2]                        |
| DNMT3A | Y533C | MUT | AML, Lung cancer          | [11]                       |
| DNMT3A | G543C | MUT | AML, MDS, Lymphoid cancer | [11, 25-28]                |
| DNMT3A | W581C | MUT | AML                       | [11, 23]                   |
| DNMT3A | R635W | MUT | MDS, AML                  | [11, 27, 29, 30]           |
| DNMT3A | V636M | MUT | AML                       | [11, 23, 30]               |
| DNMT3A | I655A | MUT | AML                       | [11, 23]                   |
| DNMT3A | R676W | MUT | AML                       | [11]                       |
| DNMT3A | G699S | MUT | MDS                       | [11]                       |
| DNMT3A | S714C | MUT | MDS, AML, Breast cancer   | [11, 26, 27, 29-31]        |
| DNMT3A | P718L | MUT | AML                       | [11, 24]                   |
| DNMT3A | R729Q | MUT | AML                       | [11, 24]                   |
| DNMT3A | R729W | MUT | AML                       | [11, 24]                   |
| DNMT3A | F731C | MUT | AML                       | [11, 23]                   |
| DNMT3A | Y735C | MUT | AML                       | [11, 23]                   |
| DNMT3A | R736H | MUT | AML, Lymphoid cancer      | [11, 24, 28]               |
| DNMT3A | L737R | MUT | AML                       | [11, 29]                   |
| DNMT3A | A741V | MUT | AML                       | [11, 24]                   |
| DNMT3A | R749C | MUT | MPN, AML                  | [8, 11]                    |
| DNMT3A | R749P | SNP |                           | [2]                        |
| DNMT3A | F752L | MUT | AML                       | [11, 23]                   |
| DNMT3A | W753G | MUT | AML                       | [11, 23]                   |
| DNMT3A | L754R | MUT | AML                       | [11, 23]                   |
| DNMT3A | S770W | MUT | AML                       | [11, 29]                   |
| DNMT3A | R771L | MUT | MDS                       | [11, 29]                   |

|        |       |     |                                         |                             |
|--------|-------|-----|-----------------------------------------|-----------------------------|
| DNMT3A | R771Q | MUT | MPN, AML, Lung cancer                   | [11]                        |
| DNMT3A | S775P | SNP |                                         | [2]                         |
| DNMT3A | R792H | MUT | AML, Lymphoid, Lung cancer              | [11, 24, 28]                |
| DNMT3A | W795C | MUT | AML                                     | [11, 23]                    |
| DNMT3A | R803S | MUT | AML                                     | [11, 24]                    |
| DNMT3A | K829R | MUT | AML                                     | [11, 24]                    |
| DNMT3A | K841Q | MUT | AML                                     | [11, 24]                    |
| DNMT3A | P849R | MUT | AML                                     | [11, 23]                    |
| DNMT3A | M880V | MUT | MPN                                     | [11, 32]                    |
| DNMT3A | R882C | MUT | MDS, MPN, MDS/MPN, AML, Lymphoid cancer | [5, 11, 23-28, 30, 32-41]   |
| DNMT3A | R882H | MUT | MDS, MPN, MDS/MPN, AML, Lymphoid cancer | [5, 11, 23-30, 33-49]       |
| DNMT3A | R882P | MUT | MDS/MPN, AML                            | [5, 11, 24, 26, 27, 36, 37] |
| DNMT3A | L889P | MUT | AML                                     | [11, 23]                    |
| DNMT3A | V897D | MUT | AML                                     | [11, 25, 26]                |
| DNMT3A | P904L | MUT | AML, Lymphoid cancer                    | [11, 24, 28, 29]            |
| DNMT3A | F909C | MUT | AML                                     | [11, 24]                    |
| DNMT3A | A910V | MUT | AML, Endometrial, Intestinal cancer     | [11, 23]                    |
| TET2   | H8D   | SNP |                                         | [2]                         |
| TET2   | P22L  | MUT | AML                                     | [11, 43]                    |
| TET2   | P29R  | SNP |                                         | [2, 9, 50-53]               |
| TET2   | L34F  | SNP |                                         | [2, 9, 50-55]               |
| TET2   | P101H | MUT | AML                                     | [11, 51]                    |
| TET2   | P174H | SNP |                                         | [2, 53, 54]                 |
| TET2   | A215V | SNP |                                         | [56]                        |
| TET2   | V218M | SNP |                                         | [2, 9, 50-53, 55]           |
| TET2   | A241V | SNP |                                         | [57]                        |
| TET2   | S282F | MUT | AML                                     | [11, 51]                    |
| TET2   | A308T | MUT | AML                                     | [58]                        |
| TET2   | N312S | MUT | AML                                     | [11, 54]                    |
| TET2   | L346P | MUT | MDS/MPN                                 | [11]                        |
| TET2   | E350K | MUT | AML                                     | [59]                        |
| TET2   | G355D | SNP |                                         | [2, 9, 50-53]               |
| TET2   | P363L | SNP |                                         | [2, 9, 50-53, 55]           |
| TET2   | S393C | SNP |                                         | [52]                        |
| TET2   | P399L | MUT | MDS/MPN                                 | [58]                        |
| TET2   | G429R | SNP |                                         | [2]                         |
| TET2   | S460F | MUT | MDS/MPN, AML                            | [52, 54]                    |
| TET2   | P472A | SNP |                                         | [2]                         |
| TET2   | P474L | SNP |                                         | [2]                         |
| TET2   | P480T | SNP |                                         | [56]                        |
| TET2   | T492S | MUT | AML                                     | [11, 51]                    |
| TET2   | Q548L | MUT | AML                                     | [11, 51]                    |

|      |        |     |                   |                             |
|------|--------|-----|-------------------|-----------------------------|
| TET2 | D666G  | MUT | MDS/MPN           | [54]                        |
| TET2 | S716L  | SNP |                   | [56]                        |
| TET2 | P761L  | SNP |                   | [2]                         |
| TET2 | N767D  | SNP |                   | [2, 60]                     |
| TET2 | D768V  | SNP |                   | [56]                        |
| TET2 | G773V  | MUT | AML               | [11, 51]                    |
| TET2 | E788L  | MUT | AML               | [11, 61]                    |
| TET2 | Q810R  | SNP |                   | [2, 9]                      |
| TET2 | R814C  | SNP |                   | [62]                        |
| TET2 | S817T  | MUT | MDS/MPN           | [58]                        |
| TET2 | S826I  | MUT | AML               | [11, 61]                    |
| TET2 | F868L  | SNP |                   | [62]                        |
| TET2 | A912G  | SNP |                   | [2]                         |
| TET2 | H924R  | SNP |                   | [2, 50, 51]                 |
| TET2 | P941S  | MUT | MDS/MPN           | [54]                        |
| TET2 | P968R  | SNP |                   | [52]                        |
| TET2 | E1010D | SNP |                   | [60]                        |
| TET2 | S1015N | SNP |                   | [56]                        |
| TET2 | I1025T | SNP |                   | [56]                        |
| TET2 | S1039L | SNP |                   | [62]                        |
| TET2 | E1073V | SNP |                   | [54]                        |
| TET2 | Q1084P | SNP |                   | [2, 50, 51, 53, 54, 56, 58] |
| TET2 | L1120M | SNP |                   | [2]                         |
| TET2 | C1135Y | MUT | MDS, MPN, MDS/MPN | [54, 63, 64]                |
| TET2 | E1144A | MUT | MPN               | [11]                        |
| TET2 | R1167T | MUT | AML               | [58]                        |
| TET2 | C1193W | MUT | MDS, MDS/MPN      | [54, 56, 65]                |
| TET2 | K1197R | MUT | MDS               | [11, 66]                    |
| TET2 | V1199I | MUT | AML               | [11, 51]                    |
| TET2 | S1204C | MUT | MPN               | [54]                        |
| TET2 | L1210P | MUT | MPN               | [67]                        |
| TET2 | C1211Y | MUT | MDS/MPN, AML      | [11, 60, 68, 69]            |
| TET2 | R1214W | MUT | MDS, MDS/MPN, AML | [50, 53, 54, 65, 70]        |
| TET2 | H1219Q | MUT | AML               | [11, 60]                    |
| TET2 | H1219R | MUT | AML               | [11, 60]                    |
| TET2 | E1222G | MUT | AML               | [11, 71]                    |
| TET2 | L1229R | MUT | AML               | [11, 53]                    |
| TET2 | E1234G | MUT | AML               | [11, 71]                    |
| TET2 | D1242V | MUT | MPN, AML          | [11, 54, 72-74]             |
| TET2 | Y1245S | MUT | MPN               | [54]                        |
| TET2 | L1248P | MUT | AML               | [11, 53]                    |
| TET2 | G1256A | MUT | AML               | [11]                        |
| TET2 | G1256D | MUT | AML               | [11]                        |
| TET2 | G1256R | MUT | AML               | [71]                        |
| TET2 | R1261C | MUT | MPN, MDS/MPN, AML | [11, 53, 54, 60, 68, 75]    |
| TET2 | R1261H | MUT | MDS/MPN, AML      | [54, 55, 76]                |

|      |        |     |                                       |                              |
|------|--------|-----|---------------------------------------|------------------------------|
| TET2 | C1263R | MUT | AML                                   | [11, 60]                     |
| TET2 | N1266Y | MUT | AML                                   | [11]                         |
| TET2 | T1270A | MUT | AML                                   | [11, 61]                     |
| TET2 | C1271S | MUT | AML                                   | [11, 53]                     |
| TET2 | C1271W | MUT | MDS, MDS/MPN, AML                     | [11, 51, 77-79]              |
| TET2 | C1271Y | MUT | AML                                   | [11, 53]                     |
| TET2 | G1275E | MUT | MDS, MPN, AML                         | [11, 56, 62, 67]             |
| TET2 | G1275R | MUT | MPN                                   | [11, 57]                     |
| TET2 | G1282D | MUT | MDS, AML                              | [11, 51, 56]                 |
| TET2 | S1286P | MUT | MDS                                   | [66]                         |
| TET2 | F1287L | MUT | MDS/MPN                               | [58]                         |
| TET2 | G1288S | MUT | AML                                   | [11, 62]                     |
| TET2 | G1288V | MUT | MPN, MDS/MPN                          | [54, 56]                     |
| TET2 | C1289Y | MUT | AML                                   | [11, 53, 60]                 |
| TET2 | W1291R | MUT | MDS, AML                              | [11, 50, 62]                 |
| TET2 | S1292R | MUT | AML                                   | [11, 51]                     |
| TET2 | C1298W | MUT | AML                                   | [5, 59]                      |
| TET2 | C1298Y | MUT | MDS/MPN, AML                          | [11, 60]                     |
| TET2 | K1299N | MUT | MDS/MPN                               | [58]                         |
| TET2 | R1302G | MUT | MPN, AML                              | [58, 73, 80]                 |
| TET2 | E1318G | MUT | MDS/MPN                               | [58]                         |
| TET2 | L1340R | MUT | AML                                   | [11, 53]                     |
| TET2 | A1355P | MUT | MDS                                   | [56]                         |
| TET2 | R1359C | MUT | MPN, MDS/MPN, AML                     | [11, 54, 62, 71, 72, 81, 82] |
| TET2 | R1359H | MUT | MDS/MPN, AML                          | [11, 62, 65]                 |
| TET2 | L1360Q | MUT | MDS                                   | [66]                         |
| TET2 | G1361D | MUT | MDS/MPN, AML                          | [11, 60, 68]                 |
| TET2 | G1361R | MUT | MPN                                   | [54]                         |
| TET2 | R1366H | MUT | AML                                   | [60, 62, 66, 75, 83]         |
| TET2 | P1367S | MUT | MDS/MPN                               | [58]                         |
| TET2 | F1368L | MUT | AML                                   | [11, 60]                     |
| TET2 | F1368Y | MUT | AML                                   | [11, 51]                     |
| TET2 | G1370V | MUT | AML                                   | [11, 51]                     |
| TET2 | T1372I | MUT | MPN                                   | [11, 67]                     |
| TET2 | D1376E | MUT | AML                                   | [11, 60]                     |
| TET2 | D1376G | MUT | AML                                   | [66]                         |
| TET2 | D1376N | MUT | MPN                                   | [11, 57]                     |
| TET2 | H1380Y | MUT | MDS, MDS/MPN, AML                     | [11, 53, 56, 60-62, 76]      |
| TET2 | H1382Y | MUT | AML                                   | [11, 60]                     |
| TET2 | D1384H | MUT | MDS, AML                              | [66, 69]                     |
| TET2 | L1398R | MUT | MDS                                   | [11, 50]                     |
| TET2 | V1417F | MUT | MDS, MDS/MPN, AML,<br>Lymphoid cancer | [6, 11, 41, 54, 60, 84]      |
| TET2 | P1419R | MUT | MDS, AML, Lymphoid<br>cancer          | [11, 53, 66, 84]             |
| TET2 | D1427Y | MUT | AML                                   | [11, 62]                     |

|      |        |     |                                    |                                                         |
|------|--------|-----|------------------------------------|---------------------------------------------------------|
| TET2 | R1440Q | SNP |                                    | [57]                                                    |
| TET2 | A1505T | SNP |                                    | [60]                                                    |
| TET2 | A1505V | MUT | AML                                | [11]                                                    |
| TET2 | E1513G | SNP |                                    | [62]                                                    |
| TET2 | V1521L | SNP |                                    | [43]                                                    |
| TET2 | S1556Y | MUT | AML                                | [59]                                                    |
| TET2 | Y1579S | MUT | AML                                | [11, 62]                                                |
| TET2 | N1641I | MUT | AML                                | [11, 71]                                                |
| TET2 | G1697R | SNP |                                    | [60]                                                    |
| TET2 | M1701I | SNP |                                    | [2, 9, 50, 53, 55, 56]                                  |
| TET2 | G1719R | MUT | MPN                                | [59]                                                    |
| TET2 | L1721W | SNP |                                    | [2, 9, 50-53, 55]                                       |
| TET2 | P1723S | SNP |                                    | [9, 50, 52-55, 57]                                      |
| TET2 | H1757D | MUT | MDS/MPN                            | [54]                                                    |
| TET2 | I1762V | SNP |                                    | [2, 9, 50-53, 55]                                       |
| TET2 | H1778R | SNP |                                    | [2, 9, 50-53, 55]                                       |
| TET2 | L1801F | MUT | AML                                | [11, 62]                                                |
| TET2 | C1811R | MUT | MDS/MPN                            | [54]                                                    |
| TET2 | L1816F | SNP |                                    | [2]                                                     |
| TET2 | H1817N | MUT | MPN, AML                           | [75, 85]                                                |
| TET2 | Q1828L | MUT | MPN                                | [54]                                                    |
| TET2 | A1831S | SNP |                                    | [9]                                                     |
| TET2 | V1833I | SNP |                                    | [60]                                                    |
| TET2 | A1863D | MUT | AML                                | [11]                                                    |
| TET2 | A1865G | MUT | AML                                | [62]                                                    |
| TET2 | H1868Y | MUT | MPN, AML                           | [11]                                                    |
| TET2 | S1870P | MUT | AML                                | [11, 53]                                                |
| TET2 | I1871S | MUT | AML                                | [11, 62]                                                |
| TET2 | I1873N | MUT | MDS                                | [56]                                                    |
| TET2 | I1873T | MUT | MDS, MPN, MDS/MPN, AML             | [11, 50, 53, 54, 58, 60, 62, 65, 68, 72, 80, 83, 85-88] |
| TET2 | C1875R | MUT | MDS                                | [11, 50]                                                |
| TET2 | A1876V | MUT | AML                                | [11, 60]                                                |
| TET2 | H1881R | MUT | MPN, MDS/MPN                       | [54, 68, 81]                                            |
| TET2 | A1882P | MUT | AML                                | [11, 60]                                                |
| TET2 | T1884A | MUT | MDS/MPN, AML                       | [53, 65, 68, 76]                                        |
| TET2 | P1889L | MUT | AML                                | [11]                                                    |
| TET2 | R1896M | MUT | AML                                | [11, 75, 80]                                            |
| TET2 | R1896S | MUT | MDS                                | [11, 50]                                                |
| TET2 | T1898F | MUT | MPN, MDS/MPN, AML, Lymphoid cancer | [11, 69, 80, 84, 89]                                    |
| TET2 | L1899P | MUT | AML                                | [11, 60]                                                |
| TET2 | V1900A | MUT | AML                                | [54, 76]                                                |
| TET2 | H1904R | MUT | MDS, MPN, AML                      | [53, 56, 85, 86]                                        |
| TET2 | G1913D | MUT | MDS                                | [11, 50, 58]                                            |
| TET2 | A1919V | MUT | MPN                                | [54]                                                    |

|      |        |     |              |              |
|------|--------|-----|--------------|--------------|
| TET2 | R1926H | MUT | MDS/MPN      | [54]         |
| TET2 | E1929K | SNP |              | [2]          |
| TET2 | P1941S | MUT | MDS/MPN, AML | [54, 56]     |
| TET2 | R1966H | MUT | MDS/MPN      | [54]         |
| TET2 | R1974M | MUT | MDS/MPN      | [54]         |
| TET2 | T1979P | MUT | MDS          | [6]          |
| TET2 | R2000K | MUT | AML          | [11, 54, 71] |



### Supplemental references

1. O. Abdel-Wahab, A. Pardanani, J. Patel, et al., "Concomitant analysis of EZH2 and ASXL1 mutations in myelofibrosis, chronic myelomonocytic leukemia and blast-phase myeloproliferative neoplasms," *Leukemia*, vol. 25, no. 7, pp. 1200-1202, 2011.
2. S. T. Sherry, M. H. Ward, M. Kholodov, et al., "dbSNP: the NCBI database of genetic variation," *Nucleic Acids Research*, vol. 29, no. 1, pp. 308-311, 2001.
3. R. Bejar, K. Stevenson, O. Abdel-Wahab, et al., "Clinical effect of point mutations in myelodysplastic syndromes," *New England Journal of Medicine*, vol. 364, no. 26, pp. 2496-2506, 2011.
4. S. Schnittger, C. Eder, S. Jeromin, et al., "ASXL1 exon 12 mutations are frequent in AML with intermediate risk karyotype and are independently associated with an adverse outcome," *Leukemia*, vol. 27, no. 1, pp. 82-91, 2013.
5. A. M. Jankowska, H. Makishima, R. V. Tiu, et al., "Mutational spectrum analysis of chronic myelomonocytic leukemia includes genes associated with epigenetic regulation: UTX, EZH2, and DNMT3A," *Blood*, vol. 118, no. 14, pp. 3932-3941, 2011.
6. Y. Sugimoto, M. A. Sekeres, H. Makishima, et al., "Cytogenetic and molecular predictors of response in patients with myeloid malignancies without del[5q] treated with lenalidomide," *Journal of Hematology and Oncology*, vol. 5, p. 4, 2012.
7. Y. Sugimoto, H. Muramatsu, H. Makishima, et al., "Spectrum of molecular defects in juvenile myelomonocytic leukaemia includes ASXL1 mutations," *British Journal of Haematology*, vol. 150, no. 1, pp. 83-87, 2010.
8. M. Brecqueville, J. Rey, F. Bertucci, et al., "Mutation analysis of ASXL1, CBL, DNMT3A, IDH1, IDH2, JAK2, MPL, NF1, SF3B1, SUZ12, and TET2 in myeloproliferative neoplasms," *Genes Chromosomes and Cancer*, vol. 51, no. 8, pp. 743-755, 2012.
9. L. Martínez-Avilés, C. Besses, A. Álvarez-Larrán, E. Torres, S. Serrano, and B. Bellosillo, "TET2, ASXL1, IDH1, IDH2, and c-CBL genes in JAK2- and MPL-negative myeloproliferative neoplasms," *Annals of Hematology*, vol. 91, no. 4, pp. 533-541, 2012.
10. J. Boulton, J. Perry, R. Zaman, et al., "High-density single nucleotide polymorphism array analysis and ASXL1 gene mutation screening in chronic myeloid leukemia during disease progression," *Leukemia*, vol. 24, no. 6, pp. 1139-1145, 2010.

11. S. A. Forbes, N. Bindal, S. Bamford, et al., "COSMIC: mining complete cancer genomes in the Catalogue of Somatic Mutations in Cancer," *Nucleic Acids Research*, vol. 39, no. suppl 1, pp. D945-D950, 2011.
12. B. Pérez, O. Kosmider, B. Cassinat, et al., "Genetic typing of CBL, ASXL1, RUNX1, TET2 and JAK2 in juvenile myelomonocytic leukaemia reveals a genetic profile distinct from chronic myelomonocytic leukaemia," *British Journal of Haematology*, vol. 151, no. 5, pp. 460-468, 2010.
13. P. Guglielmelli, F. Biamonte, J. Score, et al., "EZH2 mutational status predicts poor survival in myelofibrosis," *Blood*, vol. 118, no. 19, pp. 5227-5234, 2011.
14. T. Ernst, A. J. Chase, J. Score, et al., "Inactivating mutations of the histone methyltransferase gene EZH2 in myeloid disorders," *Nature Genetics*, vol. 42, no. 8, pp. 722-726, 2010.
15. G. Nikoloski, S. M. Langemeijer, R. P. Kuiper, et al., "Somatic mutations of the histone methyltransferase gene EZH2 in myelodysplastic syndromes," *Nature Genetics*, vol. 42, no. 8, pp. 665-667, 2010.
16. V. Grossmann, U. Bacher, A. Kohlmann, et al., "EZH2 mutations and their association with PICALM-MLLT10 positive acute leukaemia," *British Journal of Haematology*, vol. 157, no. 3, pp. 387-390, 2012.
17. R. D. Morin, N. A. Johnson, T. M. Severson, et al., "Somatic mutations altering EZH2 (Tyr641) in follicular and diffuse large B-cell lymphomas of germinal-center origin," *Nature Genetics*, vol. 42, no. 2, pp. 181-185, 2010.
18. D. Capello, A. Gloghini, M. Martini, et al., "Mutations of CD79A, CD79B and EZH2 genes in immunodeficiency-related non-Hodgkin lymphomas," *British Journal of Haematology*, vol. 152, no. 6, pp. 777-780, 2011.
19. M. T. McCabe, A. P. Graves, G. Ganji, et al., "Mutation of A677 in histone methyltransferase EZH2 in human B-cell lymphoma promotes hypertrimethylation of histone H3 on lysine 27 (H3K27)," *Proceedings of the National Academy of Sciences of the United States*, vol. 109, no. 8, pp. 2989-2994, 2012.
20. J. Wang, X. Ai, R. P. Gale, et al., "TET2, ASXL1 and EZH2 mutations in Chinese with myelodysplastic syndromes," *Leukemia Research*, vol. 37, no. 3, pp. 305-311, 2013.

21. V. Grossmann, A. Kohlmann, C. Eder, et al., "Molecular profiling of chronic myelomonocytic leukemia reveals diverse mutations in >80% of patients with TET2 and EZH2 being of high prognostic relevance," *Leukemia*, vol. 25, no. 5, pp. 877-879, 2011.
22. H. Makishima, A. M. Jankowska, R. V. Tiu, et al., "Novel homo- and hemizygous mutations in EZH2 in myeloid malignancies," *Leukemia*, vol. 24, no. 10, pp. 1799-1804, 2010.
23. I. Fried, C. Bodner, M. M. Pichler, et al., "Frequency, onset and clinical impact of somatic DNMT3A mutations in therapy-related and secondary acute myeloid leukemia," *Haematologica*, vol. 97, no. 2, pp. 246-250, 2012.
24. T. J. Ley, L. Ding, M. J. Walter, et al., "DNMT3A mutations in acute myeloid leukemia," *New England Journal of Medicine*, vol. 363, no. 25, pp. 2424-2433, 2010.
25. X. J. Yan, J. Xu, Z. H. Gu, et al., "Exome sequencing identifies somatic mutations of DNA methyltransferase gene DNMT3A in acute monocytic leukemia," *Nature Genetics*, vol. 43, no. 4, pp. 309-315, 2011.
26. Y. Shen, Y. M. Zhu, X. Fan, et al., "Gene mutation patterns and their prognostic impact in a cohort of 1185 patients with acute myeloid leukemia," *Blood*, vol. 118, no. 20, pp. 5593-5603, 2011.
27. J. Marková, P. Michková, K. Burčková, et al., "Prognostic impact of DNMT3A mutations in patients with intermediate cytogenetic risk profile acute myeloid leukemia," *European Journal of Haematology*, vol. 88, no. 2, pp. 128-135, 2012.
28. V. Grossmann, C. Haferlach, S. Weissmann, et al., "The molecular profile of adult T-cell acute lymphoblastic leukemia: mutations in RUNX1 and DNMT3A are associated with poor prognosis in T-ALL," *Genes Chromosomes and Cancer*, vol. 52, no. 4, pp. 410-422, 2013.
29. M. J. Walter, L. Ding, D. Shen, et al., "Recurrent DNMT3A mutations in patients with myelodysplastic syndromes," *Leukemia*, vol. 25, no. 7, pp. 1153-1158, 2011.
30. F. Thol, F. Damm, A. Lüdeking, et al., "Incidence and prognostic influence of DNMT3A mutations in acute myeloid leukemia," *Journal of Clinical Oncology*, vol. 29, no. 21, pp. 2889-2896, 2011.
31. M. Brecqueville, N. Cervera, V. Gelsi-Boyer, et al., "Rare mutations in DNMT3A in myeloproliferative neoplasms and myelodysplastic syndromes," *Blood Cancer Journal*, vol. 1, no. 5, p. e18, 2011.

32. N. Rao, C. M. Butcher, I. D. Lewis, et al., "Clonal and lineage analysis of somatic DNMT3A and JAK2 mutations in a chronic phase polycythemia vera patient," *British Journal of Haematology*, vol. 156, no. 2, pp. 268-270, 2012.
33. Y. Yamashita, J. Yuan, I. Suetake, et al., "Array-based genomic resequencing of human leukemia," *Oncogene*, vol. 29, no. 25, pp. 3723-3731, 2010.
34. F. Stegelmann, L. Bullinger, R. F. Schlenk, et al., "DNMT3A mutations in myeloproliferative neoplasms," *Leukemia*, vol. 25, no. 7, pp. 1217-1219, 2011.
35. F. Thol, M. Heuser, F. Damm, J. H. Klusmann, K. Reinhardt, and D. Reinhardt, "DNMT3A mutations are rare in childhood acute myeloid leukemia," *Haematologica*, vol. 96, no. 8, pp. 1238-1240, 2011.
36. J. Lin, D. M. Yao, J. Qian, et al., "Recurrent DNMT3A R882 mutations in Chinese patients with acute myeloid leukemia and myelodysplastic syndrome," *PLoS One*, vol. 6, no. 10, p. e26906, 2011.
37. O. LaRochelle, S. Bertoli, F. Vergez, et al., "Do AML patients with DNMT3A exon 23 mutations benefit from idarubicin as compared to daunorubicin? A single center experience," *Oncotarget*, vol. 2, no. 11, 850-861, 2011.
38. Y. Li, D. F. Zhang, S. W. Zhang, Y. Zeng, and Y. G. Yao, "Screening for mutation R882 in the DNMT3A gene in Chinese patients with hematological disease," *International Journal of Hematology*, vol. 96, no. 2, pp. 229-233, 2012.
39. Q. Lu, Y. Chen, H. Wang, and Z. Li, "DNMT3A mutations and clinical features in Chinese patients with acute myeloid leukemia," *Cancer Cell International*, vol. 13, no. 1, p. 1, 2013.
40. M. Ewalt, N. G. Galili, M. Mumtaz, et al., "DNMT3a mutations in high-risk myelodysplastic syndrome parallel those found in acute myeloid leukemia," *Blood Cancer Journal*, vol. 1, no. 3, p. e9, 2011.
41. M. A. Sekeres, R. V. Tiu, R. Komrokji, et al., "Phase 2 study of the lenalidomide and azacitidine combination in patients with higher-risk myelodysplastic syndromes," *Blood*, vol. 120, no. 25, pp. 4945-4951, 2012.
42. F. Thol, C. Winschel, A. Lüdeking, et al., "Rare occurrence of DNMT3A mutations in myelodysplastic syndromes," *Haematologica*, vol. 96, no. 12, pp. 1870-1873, 2011.

43. T. Ottone, L. Cicconi, S. K. Hasan, et al., "Comparative molecular analysis of therapy-related and de novo acute promyelocytic leukemia," *Leukemia Research*, vol. 36, no. 4, pp. 474-478, 2012.
44. A. Pezzi, L. Moraes, V. Valim, et al., "DNMT3A Mutations in Patients with Acute Myeloid Leukemia in South Brazil," *Advances in Hematology*, vol. 2012, Article ID 697691, 8 pages, 2012.
45. A. H. Shih, S. S. Chung, E. K. Dolezal EK, et al., "Mutational analysis of therapy-related myelodysplastic syndromes and acute myelogenous leukemia," *Haematologica*, vol. 98, no. 6, pp. 908-912, 2013.
46. O. Abdel-Wahab, A. Pardanani, R. Rampal, T. L. Lasho, R. L. Levine, and A. Tefferi, "DNMT3A mutational analysis in primary myelofibrosis, chronic myelomonocytic leukemia and advanced phases of myeloproliferative neoplasms," *Leukemia*, vol. 25, no. 7, pp. 1219-1220, 2011.
47. M. W. Wlodarski, J. Mötter, T. A. Gorr, et al., "Abnormal promoter DNA methylation in juvenile myelomonocytic leukemia is not caused by mutation in DNMT3A," *Blood*, vol. 118, no. 16, pp. 4490-4491, 2011.
48. L. Couronné, C. Bastard, and O. A. Bernard, "TET2 and DNMT3A mutations in human T-cell lymphoma," *New England Journal of Medicine*, vol. 366, no. 1, pp. 95-96, 2012.
49. C. Simon, J. Chagraoui, J. Krosl, et al., "A key role for EZH2 and associated genes in mouse and human adult T-cell acute leukemia," *Genes and Development*, vol. 26, no. 7, pp. 651-656, 2012.
50. S. M. Langemeijer, R. P. Kuiper, M. Berends, et al., "Acquired mutations in TET2 are common in myelodysplastic syndromes," *Nature Genetics*, vol. 41, no. 7, pp. 838-842, 2009.
51. O. Nibourel, O. Kosmider, M. Cheok, et al., "Incidence and prognostic value of TET2 alterations in de novo acute myeloid leukemia achieving complete remission," *Blood*, vol. 116, no. 7, pp. 1132-1135, 2010.
52. S. M. Langemeijer, J. H. Jansen, J. Hooijer, et al., "TET2 mutations in childhood leukemia," *Leukemia*, vol. 25, no. 1, pp. 189-192, 2011.
53. S. Weissmann, T. Alpermann, V. Grossmann, et al., "Landscape of TET2 mutations in acute myeloid leukemia," *Leukemia*, vol. 26, no. 5, pp. 934-942, 2012.

54. O. Abdel-Wahab, A. Mullally, C. Hedvat, et al., "Genetic characterization of TET1, TET2, and TET3 alterations in myeloid malignancies," *Blood*, vol. 114, no. 1, pp. 144-147, 2009.
55. A. Kohlmann, H. U. Klein, S. Weissmann, et al., "The Interlaboratory RObustness of Next-generation sequencing (IRON) study: a deep sequencing investigation of TET2, CBL and KRAS mutations by an international consortium involving 10 laboratories," *Leukemia*, vol. 25, no. 12, pp. 1840-1848, 2011.
56. A. E. Smith, A. M. Mohamedali, A. Kulasekararaj, et al., "Next-generation sequencing of the TET2 gene in 355 MDS and CMML patients reveals low-abundance mutant clones with early origins, but indicates no definite prognostic value," *Blood*, vol. 116, no. 19, pp. 3923-3932, 2010.
57. D. Olcaydu, E. Rumi, A. Harutyunyan, et al., "The role of the JAK2 GGCC haplotype and the TET2 gene in familial myeloproliferative neoplasms," *Haematologica*, vol. 96, no. 3, pp. 367-374, 2011.
58. A. M. Jankowska, H. Szpurka, R. V. Tiu, et al., "Loss of heterozygosity 4q24 and TET2 mutations associated with myelodysplastic/myeloproliferative neoplasms," *Blood*, vol. 113, no. 25, pp. 6403-6410, 2009.
59. H. Makishima, A. M. Jankowska, M. A. McDevitt, et al., "CBL, CBLB, TET2, ASXL1, and IDH1/2 mutations and additional chromosomal aberrations constitute molecular events in chronic myelogenous leukemia," *Blood*, vol. 117, no. 21, pp. e198-e206, 2011.
60. K. H. Metzeler, K. Maharry, M. D. Radmacher, et al., "TET2 mutations improve the new European LeukemiaNet risk classification of acute myeloid leukemia: a Cancer and Leukemia Group B study," *Journal of Clinical Oncology*, vol. 29, no. 10, pp. 1373-1381, 2011.
61. J. Nomdedéu, M. Hoyos, M. Carricondo, et al., "Adverse impact of IDH1 and IDH2 mutations in primary AML: experience of the Spanish CETLAM group," *Leukemia Research*, vol. 36, no. 8, pp. 990-997, 2012.
62. W. C. Chou, S. C. Chou, C. Y. Liu, et al., "TET2 mutation is an unfavorable prognostic factor in acute myeloid leukemia patients with intermediate-risk cytogenetics," *Blood*, vol. 118, no. 14, pp. 3803-3810, 2011.

63. A. Thiel, M. Beier, D. Ingenhag, et al., "Comprehensive array CGH of normal karyotype myelodysplastic syndromes reveals hidden recurrent and individual genomic copy number alterations with prognostic relevance," *Leukemia*, vol. 25, no. 3, pp. 387-399, 2011.
64. C. Pérez, N. Martínez-Calle, J. I. Martín-Subero, et al., "TET2 mutations are associated with specific 5-methylcytosine and 5-hydroxymethylcytosine profiles in patients with chronic myelomonocytic leukemia," *PLoS One*, vol. 7, no. 2, p. e31605, 2012.
65. O. Kosmider, V. Gelsi-Boyer, M. Ciudad, et al., "TET2 gene mutation is a frequent and adverse event in chronic myelomonocytic leukemia," *Haematologica*, vol. 94, no. 12, pp. 1676-1681, 2009.
66. J. Rocquain, N. Carbuccion, V. Trouplin, et al., "Combined mutations of ASXL1, CBL, FLT3, IDH1, IDH2, JAK2, KRAS, NPM1, NRAS, RUNX1, TET2 and WT1 genes in myelodysplastic syndromes and acute myeloid leukemias," *BMC Cancer*, vol. 10, p. 401, 2010.
67. F. X. Schaub, R. Looser, S. Li, et al., "Clonal analysis of TET2 and JAK2 mutations suggests that TET2 can be a late event in the progression of myeloproliferative neoplasms," *Blood*, vol. 115, no. 10, pp. 2003-2007, 2010.
68. A. Kohlmann, V. Grossmann, H. U. Klein, et al., "Next-generation sequencing technology reveals a characteristic pattern of molecular mutations in 72.8% of chronic myelomonocytic leukemia by detecting frequent alterations in TET2, CBL, RAS, and RUNX1," *Journal of Clinical Oncology*, vol. 28, no. 24, pp. 3858-3865, 2010.
69. O. Kosmider, E. Delabesse, V. M. de Mas, et al., "TET2 mutations in secondary acute myeloid leukemias: a French retrospective study," *Haematologica*, vol. 96, no. 7, pp. 1059-1063, 2011.
70. J. Flach, F. Dicker, S. Schnittger, A. Kohlmann, T. Haferlach, and C. Haferlach, "Mutations of JAK2 and TET2, but not CBL are detectable in a high portion of patients with refractory anemia with ring sideroblasts and thrombocytosis," *Haematologica*, vol. 95, no. 3, pp. 518-519, 2010.
71. O. Abdel-Wahab, T. Manshouri, J. Patel, et al., "Genetic analysis of transforming events that convert chronic myeloproliferative neoplasms to leukemias," *Cancer Research*, vol. 70, no. 2, pp. 447-452, 2010.

72. A. Tefferi, A. Pardanani, K. H. Lim, et al., "TET2 mutations and their clinical correlates in polycythemia vera, essential thrombocythemia and myelofibrosis," *Leukemia*, vol. 23, no. 5, pp. 905-911, 2009.
73. E. Pronier, C. Almire, H. Mokrani, et al., "Inhibition of TET2-mediated conversion of 5-methylcytosine to 5-hydroxymethylcytosine disturbs erythroid and granulomonocytic differentiation of human hematopoietic progenitors," *Blood*, vol. 118, no. 9, pp. 2551-2555, 2011.
74. P. A. Beer, F. Delhommeau, J. P. LeCouédic, et al., "Two routes to leukemic transformation after a JAK2 mutation-positive myeloproliferative neoplasm," *Blood*, vol. 115, no. 14, pp. 2891-2900, 2010.
75. K. Moran-Crusio, L. Reavie, A. Shih, et al., "Tet2 loss leads to increased hematopoietic stem cell self-renewal and myeloid transformation," *Cancer Cell*, vol. 20, no. 1, pp. 11-24, 2011.
76. V. I. Gaidzik, P. Paschka, D. Späth, et al., "TET2 mutations in acute myeloid leukemia (AML): results from a comprehensive genetic and clinical analysis of the AML study group," *Journal of Clinical Oncology*, vol. 30, no. 12, pp. 1350-1357, 2012.
77. M. T. Voso, E. Fabiani, A. Piciocchi, et al., "Role of BCL2L10 methylation and TET2 mutations in higher risk myelodysplastic syndromes treated with 5-azacytidine," *Leukemia*, vol. 25, no. 12, pp. 1910-1913, 2011.
78. K. Yoshida, M. Sanada, Y. Shiraishi, et al., "Frequent pathway mutations of splicing machinery in myelodysplasia," *Nature*, vol. 478, no. 7367, pp. 64-69, 2011.
79. U. Bacher, S. Weissmann, A. Kohlmann, et al., "TET2 deletions are a recurrent but rare phenomenon in myeloid malignancies and are frequently accompanied by TET2 mutations on the remaining allele," *British Journal of Haematology*, vol. 156, no. 1, pp. 67-75, 2012.
80. F. Delhommeau, S. Dupont, V. Della Valle, et al., "Mutation in TET2 in myeloid cancers," *New England Journal of Medicine*, vol. 360, no. 22, pp. 2289-2301, 2009.
81. A. Tefferi, R. L. Levine, K. H. Lim, et al., "Frequent TET2 mutations in systemic mastocytosis: clinical, KITD816V and FIP1L1-PDGFRα correlates," *Leukemia*, vol. 23, no. 5, pp. 900-904, 2009.
82. V. Gelsi-Boyer, V. Trouplin, J. Roquain, et al., "ASXL1 mutation is associated with poor prognosis and acute transformation in chronic myelomonocytic leukaemia," *British Journal of Haematology*, vol. 151, no. 4, pp. 365-375, 2010.



83. L. Couronné, E. Lippert, J. Andrieux, et al., "Analyses of TET2 mutations in post-myeloproliferative neoplasm acute myeloid leukemias," *Leukemia*, vol. 24, no. 1, pp. 201-203, 2010.
84. C. Quivoron, L. Couronné, V. Della Valle, et al., "TET2 inactivation results in pleiotropic hematopoietic abnormalities in mouse and is a recurrent event during human lymphomagenesis," *Cancer Cell*, vol. 20, no. 1, pp. 25-38, 2011.
85. M. Ko, Y. Huang, A. M. Jankowska, et al., "Impaired hydroxylation of 5-methylcytosine in myeloid cancers with mutant TET2," *Nature*, vol. 468, no. 7325, pp. 839-843, 2010.
86. F. Traina, V. Visconte, A. M. Jankowska, et al., "Single nucleotide polymorphism array lesions, TET2, DNMT3A, ASXL1 and CBL mutations are present in systemic mastocytosis," *PLoS One*, vol. 7, no. 8, p. e43090, 2012.
87. N. Konstandin, S. Bultmann, A. Szwagierczak, et al., "Genomic 5-hydroxymethylcytosine levels correlate with TET2 mutations and a distinct global gene expression pattern in secondary acute myeloid leukemia," *Leukemia*, vol. 25, no. 10, pp. 1649-1652, 2011.
88. O. Kosmider, V. Gelsi-Boyer, M. Cheok, et al., "TET2 mutation is an independent favorable prognostic factor in myelodysplastic syndromes (MDSs)," *Blood*, vol. 114, no. 15, pp. 3285-3291, 2009.
89. C. Pérez, N. Martínez-Calle, J. I. Martín-Subero, et al., "TET2 mutations are associated with specific 5-methylcytosine and 5-hydroxymethylcytosine profiles in patients with chronic myelomonocytic leukemia," *PLoS One*, vol. 7, no. 2, p. e31605, 2012.
